# Supplementary material for: Evaluation of Physicochemical Characteristics and Sensory Properties of Cold Brew Coffees Prepared Using Ultrahigh Pressure under Different Extraction Conditions
Source: MDPI journal article supplement (doi:10.3390/foods12203857), 2023-10-21
Supplement: s1 [file s1]

**Table S1.** Volatile components of UHP-assisted cold brew coffee under different pressures

| Aroma Type    | Compound Name                 | Aroma descriptor          | Content/(μg/L)           |                                       |                            |                          |                          | Control group                         |
|---------------|-------------------------------|---------------------------|--------------------------|---------------------------------------|----------------------------|--------------------------|--------------------------|---------------------------------------|
|               |                               |                           | Pressure/(MPa)           |                                       |                            |                          |                          |                                       |
|               |                               |                           | 100                      | 200                                   | 300                        | 400                      | 500                      |                                       |
| Furans        | 2-methylfuran                 | Chocolate                 | 2.59±0.10 <sup>a</sup>   | 1.19±0.06 <sup>d</sup>                | 1.13±0.03 <sup>d</sup>     | 1.98±0.10 <sup>b</sup>   | 1.39±0.05 <sup>c</sup>   | 1.56±0.11 <sup>c</sup>                |
|               | 2, 5-dimethylfuran            | Meaty, beef, bacon        | 0.25±0.01 <sup>d</sup>   | 0.25±0.01 <sup>d</sup>                | 0.49±0.03 <sup>c</sup>     | 0.62±0.02 <sup>b</sup>   | 0.99±0.07 <sup>a</sup>   | 0.30±0.02 <sup>d</sup>                |
|               | furfural                      | Almond, bread             | 75.71±                   | 77.57±                                | 80.53±                     | 82.58±                   | 93.07±                   | 86.46±                                |
|               |                               |                           | 2.73 <sup>d</sup>        | 3.08 <sup>d</sup>                     | 4.20 <sup>c</sup>          | 4.35 <sup>bc</sup>       | 4.29 <sup>a</sup>        | 3.83 <sup>b</sup>                     |
|               | 2-acetyl-5-methylfuran        | Nutty, vanilla, coconut   | -                        | 0.39±0.01 <sup>c</sup>                | 0.48±0.04 <sup>b</sup>     | 0.96±0.07 <sup>a</sup>   | 0.51±0.02 <sup>b</sup>   | 0.98±0.05 <sup>a</sup>                |
|               | 2-propionylfuran              | Fruit                     | -                        | 4.25±0.15 <sup>b</sup>                | 4.79±0.13 <sup>a</sup>     | 4.64±0.20 <sup>ab</sup>  | 3.06±0.11 <sup>c</sup>   | 5.06±0.22 <sup>a</sup>                |
|               | 2-(furan-2-methyl-furan)      | Roasted                   | 2.27±0.10 <sup>c</sup>   | 2.29±0.13 <sup>c</sup>                | 2.58±0.11 <sup>b</sup>     | 2.46±0.09 <sup>bc</sup>  | 2.88±0.12 <sup>a</sup>   | 3.16±0.13 <sup>a</sup>                |
|               | Furfuryl alcohol              | Caramel                   | 21.90                    | 23.31                                 | 23.51                      | 24.21                    | 24.55                    | 25.33                                 |
|               |                               |                           | ±1.54 <sup>b</sup>       | ±1.21 <sup>a</sup>                    | ±1.87 <sup>a</sup>         | ±1.33 <sup>a</sup>       | ±1.49 <sup>a</sup>       | ±1.77 <sup>a</sup>                    |
| 2-acetylfuran | Sweet, almond, cocoa, caramel | 15.88                     | 17.60                    | 17.44                                 | 18.59                      | 20.85                    | 19.91                    |                                       |
|               |                               | ±0.66 <sup>c</sup>        | ±0.78 <sup>b</sup>       | ±0.92 <sup>b</sup>                    | ±0.71 <sup>ab</sup>        | ±0.88 <sup>a</sup>       | ±0.76 <sup>a</sup>       |                                       |
|               | Total                         |                           | 118.61±6.72 <sup>d</sup> | 126.86±7.05 <sup>c</sup> <sup>d</sup> | 130.93±5.95 <sup>abc</sup> | 136.04±5.47 <sup>b</sup> | 147.32±6.84 <sup>a</sup> | 142.74±8.43 <sup>a</sup> <sup>b</sup> |
| Aldehydes     | 2-methylbutyral               | Cocoa, coffee, nutty      | 6.16                     | 6.32                                  | 7.59                       | 8.35                     | 8.18                     | 9.07                                  |
|               |                               |                           | ±0.23 <sup>c</sup>       | ±0.35 <sup>c</sup>                    | ±0.42 <sup>b</sup>         | ±0.52 <sup>ab</sup>      | ±0.47 <sup>ab</sup>      | ±0.63 <sup>a</sup>                    |
|               | isoamylaldehyde               | Chocolate                 | 6.40±0.30 <sup>d</sup>   | 6.73±0.38 <sup>d</sup>                | 6.81±0.35 <sup>d</sup>     | 8.89±0.44 <sup>b</sup>   | 9.75±0.39 <sup>a</sup>   | 7.80±0.35 <sup>c</sup>                |
|               | Hexal (aldehyde C-6)          | Green, fruity             | 0.98±0.03 <sup>a</sup>   | 0.56±0.02 <sup>c</sup>                | 1.11±0.04 <sup>a</sup>     | 0.69±0.01 <sup>b</sup>   | 0.40±0.02 <sup>c</sup>   | 0.39±0.01 <sup>c</sup>                |
|               | benzaldehyde                  | Bitter almond odor, nutty | 2.67±0.09 <sup>a</sup>   | 2.04±0.06 <sup>b</sup>                | 1.95±0.07 <sup>bc</sup>    | 1.83±0.04 <sup>c</sup>   | 1.93±0.03 <sup>bc</sup>  | 2.53±0.06 <sup>a</sup>                |
|               | 5-methylfurfural              | Spicy, caramel, maple     | 64.96                    | 67.29                                 | 66.64                      | 65.19                    | 69.88                    | 80.26                                 |
|               |                               |                           | ±4.28 <sup>b</sup>       | ±3.96 <sup>b</sup>                    | ±4.72 <sup>b</sup>         | ±4.20 <sup>b</sup>       | ±3.78 <sup>b</sup>       | ±4.23 <sup>a</sup>                    |
|               | 1-methyl-2-                   | Roasted, nutty            | 9.25±0.44 <sup>c</sup>   | 10.31±0.42 <sup>bc</sup>              | 10.20±0.55 <sup>bc</sup>   | 9.32±0.54 <sup>c</sup>   | 11.33±0.62 <sup>a</sup>  | 11.85±0.45 <sup>a</sup>               |

|                   |                                    |                                        |                         |                          |                          |                          |                           |                          |
|-------------------|------------------------------------|----------------------------------------|-------------------------|--------------------------|--------------------------|--------------------------|---------------------------|--------------------------|
| pyrroformaldehyde |                                    |                                        |                         |                          |                          |                          |                           |                          |
| Total             |                                    |                                        | 90.42±4.92 <sup>c</sup> | 93.26±6.43 <sup>bc</sup> | 94.30±5.39 <sup>bc</sup> | 94.25±4.92 <sup>bc</sup> | 101.48±5.34 <sup>ab</sup> | 111.89±6.53 <sup>a</sup> |
| Esters            | Glycol diacetate                   | Green, flowery, alcoholic              | 2.51±0.03 <sup>a</sup>  | 1.69±0.02 <sup>b</sup>   | 1.61±0.02 <sup>b</sup>   | 1.79±0.03 <sup>b</sup>   | 1.75±0.02 <sup>b</sup>    | 2.60±0.04 <sup>a</sup>   |
|                   | Furfuryl acetate                   | Sweet, banana                          | 67.06                   | 69.37                    | 67.21                    | 67.63                    | 71.64                     | 78.61                    |
|                   |                                    |                                        | ±4.29 <sup>b</sup>      | ±3.88 <sup>b</sup>       | ±4.04 <sup>b</sup>       | ±3.90 <sup>b</sup>       | ±3.76 <sup>ab</sup>       | ±4.19 <sup>a</sup>       |
|                   | Furfuryl propionate                | Sweet, fruit, banana                   | 2.70±0.04 <sup>c</sup>  | 3.14±0.10 <sup>b</sup>   | 3.11±0.09 <sup>b</sup>   | 3.04±0.07 <sup>b</sup>   | 2.34±0.05 <sup>d</sup>    | 4.35±0.12 <sup>a</sup>   |
| Total             |                                    |                                        | 72.27±4.33 <sup>b</sup> | 74.20±4.50 <sup>b</sup>  | 71.94±5.13 <sup>b</sup>  | 72.46±4.85 <sup>b</sup>  | 75.73±5.31 <sup>b</sup>   | 85.57±6.45 <sup>a</sup>  |
| Pyrazines         | 2, 5-dimethylpyrazine              | Cocoa, nutty, beef                     | 6.27±0.33 <sup>d</sup>  | 7.17±0.36 <sup>c</sup>   | 7.82±0.52 <sup>b</sup>   | 8.10±0.41 <sup>ab</sup>  | 8.90±0.61 <sup>a</sup>    | 8.33±0.39 <sup>ab</sup>  |
|                   | 2, 6-dimethylpyrazine              | Cocoa, roasted, nutty                  | 9.41±0.67 <sup>a</sup>  | 7.83±0.40 <sup>b</sup>   | 7.19±0.33 <sup>c</sup>   | 7.47±0.43 <sup>bc</sup>  | 7.86±0.42                 | 7.89±0.53 <sup>b</sup>   |
|                   | 2-ethylpyrazine                    | Peanut, butter, nutty, cocoa           | 5.39±0.32 <sup>c</sup>  | 6.44±0.39 <sup>b</sup>   | 6.74±0.37 <sup>ab</sup>  | 6.63±0.43 <sup>ab</sup>  | 7.41±0.48 <sup>a</sup>    | 7.36±0.45 <sup>a</sup>   |
|                   | 2, 3-dimethylpyrazine              | Nutty, cocoa, peanut                   | 0.56±0.02 <sup>b</sup>  | 0.58±0.01 <sup>b</sup>   | 0.99±0.05 <sup>a</sup>   | 0.88±0.02 <sup>a</sup>   | 0.61±0.02 <sup>b</sup>    | 0.61±0.03 <sup>b</sup>   |
|                   | 2-ethyl-6-methylpyrazine           | Potato                                 | 11.93                   | 12.49                    | 12.96                    | 11.83                    | 14.11                     | 15.88                    |
|                   |                                    |                                        | ±0.53 <sup>d</sup>      | ±0.61 <sup>cd</sup>      | ±0.67 <sup>c</sup>       | ±0.59 <sup>d</sup>       | ±0.72 <sup>b</sup>        | ±0.65 <sup>a</sup>       |
|                   | Hazelnut pyrazine                  | Nutty, peanut, corn, bread             | 2.40±0.12 <sup>e</sup>  | 3.14±0.21 <sup>d</sup>   | 4.97±0.27 <sup>c</sup>   | 5.73±0.28 <sup>b</sup>   | 6.70±0.45 <sup>a</sup>    | 6.09±0.44 <sup>ab</sup>  |
| 3, 6-theopyrazine |                                    |                                        | 4.80±0.31 <sup>c</sup>  | 5.84±0.33 <sup>b</sup>   | 4.96±0.37 <sup>c</sup>   | 5.98±0.45 <sup>b</sup>   | 6.61±0.39 <sup>ab</sup>   | 7.20±0.52 <sup>a</sup>   |
| Total             |                                    |                                        | 40.78±2.49 <sup>c</sup> | 43.47±3.01 <sup>bc</sup> | 45.63±2.88 <sup>b</sup>  | 46.63±2.97 <sup>b</sup>  | 52.22±3.85 <sup>a</sup>   | 53.34±4.13 <sup>a</sup>  |
| Alcohols          | hexanol                            | Alcoholic                              | 0.77±0.02 <sup>b</sup>  | 0.89±0.01 <sup>a</sup>   | 0.85±0.01 <sup>a</sup>   | 0.90±0.02 <sup>a</sup>   | 0.91±0.03 <sup>a</sup>    | 0.69±0.02 <sup>c</sup>   |
|                   | (E) -linalool oxide (furanic acid) | Flowery                                | 4.72±0.25 <sup>d</sup>  | 5.24±0.33 <sup>c</sup>   | 5.78±0.39 <sup>bc</sup>  | 5.69±0.31 <sup>bc</sup>  | 6.38±0.41 <sup>b</sup>    | 7.75±0.40 <sup>a</sup>   |
|                   | 2-ethyl-1-hexanol                  | Oranges, flowery, sweet                | -                       | 0.60±0.02 <sup>c</sup>   | 0.59±0.01 <sup>c</sup>   | 0.71±0.03 <sup>b</sup>   | 0.80±0.03 <sup>a</sup>    | 0.59±0.01 <sup>c</sup>   |
|                   | linalool                           | Oranges, flowery, sweet, rose          | 6.70±0.44 <sup>d</sup>  | 7.45±0.39 <sup>c</sup>   | 7.79±0.52 <sup>bc</sup>  | 7.82±0.47 <sup>bc</sup>  | 8.31±0.55 <sup>b</sup>    | 12.93±0.73 <sup>a</sup>  |
|                   | alpha-terpineol                    | Pine, terpene, lilac, Oranges, flowery | 2.05±0.09 <sup>bc</sup> | 2.16±0.12 <sup>b</sup>   | 2.10±0.10 <sup>b</sup>   | 1.93±0.15 <sup>c</sup>   | 2.20±0.11 <sup>b</sup>    | 3.24±0.17 <sup>a</sup>   |

|          |                          |                                 |                          |                          |                          |                          |                         |                          |
|----------|--------------------------|---------------------------------|--------------------------|--------------------------|--------------------------|--------------------------|-------------------------|--------------------------|
|          | nerolol                  | Sweet, oranges                  | -                        | 0.39±0.01 <sup>c</sup>   | 0.38±0.02 <sup>c</sup>   | 0.48±0.02 <sup>b</sup>   | 0.69±0.03 <sup>a</sup>  |                          |
|          | Total                    |                                 | 14.25±0.95 <sup>d</sup>  | 16.36±0.73 <sup>c</sup>  | 17.52±0.98 <sup>bc</sup> | 17.44±1.05 <sup>bc</sup> | 19.10±1.47 <sup>b</sup> | 25.89±1.59 <sup>a</sup>  |
| Ketones  | Methyl ethyl ketone      | Fruity                          | 0.85±0.04 <sup>a</sup>   | 0.58±0.03 <sup>b</sup>   | 0.62±0.03 <sup>b</sup>   | -                        | 0.80±0.06 <sup>a</sup>  | 0.68±0.04 <sup>b</sup>   |
|          | 2, 3-butanedione         | Butter, sweet, caramel          | 1.36±0.07 <sup>c</sup>   | 1.73±0.10 <sup>b</sup>   | 1.64±0.17 <sup>b</sup>   | 2.33±0.15 <sup>a</sup>   | 2.20±0.13 <sup>a</sup>  | 0.63±0.07 <sup>d</sup>   |
|          | 2, 3-hexadione           | Sweet, caramel, butter          | 1.78±0.14 <sup>b</sup>   | 1.85±0.15 <sup>b</sup>   | 1.97±0.12 <sup>ab</sup>  | 2.16±0.15 <sup>a</sup>   | 2.25±0.11 <sup>a</sup>  | 1.70±0.16 <sup>b</sup>   |
|          | 3, 4-hexanedione         | Butter, almond, nutty           | 1.28±0.09 <sup>a</sup>   | 0.67±0.05 <sup>c</sup>   | 0.85±0.09 <sup>b</sup>   | 0.83±0.07 <sup>b</sup>   | 0.93±0.09 <sup>b</sup>  | 0.81±0.04 <sup>b</sup>   |
|          | ethylcyclopentenone      | Sweet, caramel, maple           | 2.01±0.10 <sup>b</sup>   | 2.05±0.14 <sup>b</sup>   | 2.06±0.15 <sup>b</sup>   | 1.99±0.20 <sup>b</sup>   | 2.16±0.14 <sup>b</sup>  | 2.59±0.13 <sup>a</sup>   |
|          | 3-hexanone               | Sweet, fruit, waxiness          | 0.54±0.03 <sup>a</sup>   | -                        | 0.25±0.04 <sup>b</sup>   | -                        | -                       | -                        |
|          | 2, 3-pentadione          | Butter, caramel, caramel, nutty | 7.71±0.50 <sup>b</sup>   | 6.49±0.26 <sup>d</sup>   | 8.29±0.34 <sup>ab</sup>  | 8.47±0.41 <sup>ab</sup>  | 8.90±0.37 <sup>a</sup>  | 6.90±0.42 <sup>c</sup>   |
|          | (E) -beta-damascenone    | Apple, rose, honey, sweet       | -                        | -                        | -                        | -                        | -                       | 0.45±0.04 <sup>a</sup>   |
|          | Furfural acetone         | Spicy, cinnamon, vanilla        | -                        | -                        | -                        | -                        | -                       | 0.41±0.03 <sup>a</sup>   |
|          | Total                    |                                 | 15.53±1.16 <sup>b</sup>  | 13.37±1.43 <sup>c</sup>  | 15.67±1.29 <sup>b</sup>  | 15.78±1.35 <sup>b</sup>  | 17.26±1.54 <sup>a</sup> | 14.17±1.09 <sup>bc</sup> |
| Pyridine | pyridine                 | Sour, pourri                    | 12.86                    | 12.85                    | 13.74                    | 14.12                    | 14.70                   | 12.57                    |
|          |                          |                                 | ±0.53 <sup>b</sup>       | ±0.62 <sup>b</sup>       | ±0.57 <sup>ab</sup>      | ±0.65 <sup>a</sup>       | ±0.49 <sup>a</sup>      | ±0.62 <sup>b</sup>       |
|          | 3-ethylpyridine          | Tobacco, leather                | -                        | 0.43±0.04 <sup>b</sup>   | 0.37±0.04 <sup>b</sup>   | 0.57±0.05 <sup>a</sup>   | -                       | -                        |
|          | Total                    |                                 | 12.86±1.06 <sup>ab</sup> | 13.29±1.29 <sup>ab</sup> | 14.11±0.98 <sup>a</sup>  | 14.70±1.15 <sup>a</sup>  | 14.70±1.43 <sup>a</sup> | 12.57±1.11 <sup>b</sup>  |
| Phenols  | phenol                   | Plastics, caoutchouc            | 0.19±0.01 <sup>f</sup>   | 0.52±0.04 <sup>e</sup>   | 1.11±0.06 <sup>d</sup>   | 1.41±0.08 <sup>c</sup>   | 1.75±0.11 <sup>b</sup>  | 2.17±0.19 <sup>a</sup>   |
|          | 4-ethyl guaiacol         | Spicy, smoky, bacon             | 1.02±0.08 <sup>c</sup>   | 1.09±0.10 <sup>bc</sup>  | 1.25±0.13 <sup>b</sup>   | 1.16±0.11 <sup>b</sup>   | 1.18±0.10 <sup>b</sup>  | 1.98±0.15 <sup>a</sup>   |
|          | o-cresol                 | Musty, plastics, herbs          | -                        | 0.61±0.05 <sup>b</sup>   | 0.49±0.06 <sup>b</sup>   | 0.54±0.05 <sup>b</sup>   | 0.58±0.07 <sup>b</sup>  | 0.80±0.06 <sup>a</sup>   |
|          | Total                    |                                 | 1.21±0.05 <sup>e</sup>   | 2.22±0.08 <sup>d</sup>   | 2.83±0.11 <sup>c</sup>   | 3.11±0.19 <sup>bc</sup>  | 3.51±0.23 <sup>b</sup>  | 4.96±0.30 <sup>a</sup>   |
| Pyrrole  | 1-methylpyrrole          | Smoky, woody, herbs             | 2.48±0.10 <sup>a</sup>   | 1.27±0.08 <sup>c</sup>   | 1.33±0.09                | 2.74±0.20 <sup>a</sup>   | 1.55±0.19 <sup>b</sup>  | 1.24±0.13 <sup>c</sup>   |
|          | 2-acetyl-1-methylpyrrole | Earthy                          | 2.68±0.12 <sup>c</sup>   | 3.34±0.19 <sup>b</sup>   | 3.19±0.20 <sup>b</sup>   | 2.76±0.18 <sup>c</sup>   | 3.22±0.16 <sup>b</sup>  | 4.06±0.29 <sup>a</sup>   |
|          | 1-furfuryl pyrrole       | Plastics, green, waxiness,      | 7.47±0.43 <sup>bc</sup>  | 7.37±0.36 <sup>bc</sup>  | 7.56±0.52 <sup>bc</sup>  | 7.01±0.43 <sup>c</sup>   | 8.00±0.50 <sup>b</sup>  | 9.33±0.55 <sup>a</sup>   |

|        |                         |                         |                         |                          |                         |                           |                           |                         |
|--------|-------------------------|-------------------------|-------------------------|--------------------------|-------------------------|---------------------------|---------------------------|-------------------------|
|        |                         | vegetables              |                         |                          |                         |                           |                           |                         |
|        | 2-acetylpyrrole         | Musty, cherry           | 1.20±0.10 <sup>a</sup>  | 0.75±0.06 <sup>c</sup>   | 0.61±0.05 <sup>d</sup>  | 0.44±0.07 <sup>e</sup>    | 0.63±0.05 <sup>d</sup>    | 0.94±0.05 <sup>b</sup>  |
|        | 2-formylpyrrole         | Musty                   | 0.85±0.05 <sup>b</sup>  | 0.91±0.07 <sup>b</sup>   | 0.69±0.05 <sup>c</sup>  | 0.43±0.04 <sup>d</sup>    | 0.82±0.07 <sup>b</sup>    | 1.24±0.10 <sup>a</sup>  |
|        | Total                   |                         | 14.68±1.05 <sup>b</sup> | 13.66±1.23 <sup>bc</sup> | 13.37±1.17 <sup>c</sup> | 13.37±1.20 <sup>c</sup>   | 14.20±0.98 <sup>bc</sup>  | 16.82±1.03 <sup>a</sup> |
| Ethers | Furfuryl methyl ether   | Roasted, coffee         | 2.44±0.15 <sup>b</sup>  | 2.26±0.18 <sup>b</sup>   | 2.34±0.19 <sup>b</sup>  | 2.82±0.16 <sup>a</sup>    | 2.56±0.20 <sup>ab</sup>   | 1.98±0.15 <sup>c</sup>  |
|        | Difurfuryl ether        | Coffee, nutty, earthy   | 1.29±0.09 <sup>c</sup>  | 1.65±0.08 <sup>b</sup>   | 1.55±0.12 <sup>bc</sup> | 1.44±0.10 <sup>bc</sup>   | 1.35±0.12 <sup>c</sup>    | 2.53±0.19 <sup>a</sup>  |
|        | Furfuryl methyl sulfide | Onion, garlic, sulphury | 2.92±0.19 <sup>a</sup>  | 2.26±0.20 <sup>b</sup>   | -                       | -                         | -                         | -                       |
|        | Total                   |                         | 6.66±0.45 <sup>a</sup>  | 6.16±0.39 <sup>a</sup>   | 3.90±0.21 <sup>c</sup>  | 4.28±0.33 <sup>bc</sup>   | 3.91±0.29 <sup>c</sup>    | 4.54±0.34 <sup>b</sup>  |
|        | Total compounds         |                         | 387.25±25.7             | 402.84±32.8              | 410.23±27.4             | 418.05±36.47 <sup>a</sup> | 449.40±39.66 <sup>a</sup> | 472.49±40.23            |
|        |                         |                         | 5 <sup>b</sup>          | 8 <sup>ab</sup>          | 3 <sup>ab</sup>         | b                         | b                         | a                       |

Values are expressed as mean ± standard deviation. The superscript letters (a, b, c, d, e, and f) represent statistically significant differences between extraction conditions, as determined through one-way analysis of variance ( $p < 0.05$ ). Control group: conventional cold brew (0.1 MPa, 12 h, 5°C)

**Table S2.** Volatile components of UHP-assisted cold brew coffee at different times

|            |                          |                                        | Content/(μg/L)            |                                |                            |                           |                            |                          |
|------------|--------------------------|----------------------------------------|---------------------------|--------------------------------|----------------------------|---------------------------|----------------------------|--------------------------|
| Aroma Type | Compound Name            | Aroma descriptor                       | Time/(min)                |                                |                            |                           |                            | Control group            |
|            |                          |                                        | 10                        | 15                             | 20                         | 25                        | 30                         |                          |
| Furans     | 2-methylfuran            | Chocolate                              | 0.84±0.05 <sup>d</sup>    | 1.42±0.09 <sup>b</sup>         | 1.13±0.07 <sup>c</sup>     | 1.56±0.12 <sup>b</sup>    | 2.26±0.15 <sup>a</sup>     | 1.56±0.09 <sup>b</sup>   |
|            | 2, 5-dimethylfuran       | Meaty, beef, bacon                     | 0.42±0.03 <sup>c</sup>    | 0.56±0.04 <sup>b</sup>         | 0.49±0.03 <sup>bc</sup>    | 0.28±0.02                 | 0.66±0.04 <sup>a</sup>     | 0.3±0.02 <sup>d</sup>    |
|            | furfural                 | Sweet, almond, bread                   | 77.83±5.64 <sup>c</sup>   | 78.47±5.42 <sup>c</sup>        | 80.53±5.74 <sup>bc</sup>   | 82.21±7.32 <sup>bc</sup>  | 94.99±5.65 <sup>a</sup>    | 86.46±4.85 <sup>b</sup>  |
|            | 2-acetyl-5-methylfuran   | Nutty, vanilla, coconut                | -                         | 0.54±0.04 <sup>c</sup>         | 0.48±0.04 <sup>c</sup>     | 0.77±0.05 <sup>b</sup>    | -                          | 0.98±0.09 <sup>a</sup>   |
|            | 2-propionylfuran         | Fruit                                  | -                         | 4.44±0.03 <sup>b</sup>         | 4.79±0.35 <sup>ab</sup>    | 4.31±0.42 <sup>b</sup>    | -                          | 5.06±0.35 <sup>a</sup>   |
|            | 2-(furan-2-methyl-furan) | Roasted                                | 2.32±0.15 <sup>d</sup>    | 2.65±0.21 <sup>c</sup>         | 2.58±0.17 <sup>c</sup>     | 2.76±0.12 <sup>b</sup>    | 3.08±0.26 <sup>a</sup>     | 3.16±0.24 <sup>a</sup>   |
|            | Furfuryl alcohol         | Caramel                                | 20.38±1.36 <sup>c</sup>   | 23.40±1.45 <sup>bc</sup>       | 23.51±1.93 <sup>bc</sup>   | 24.45±2.11 <sup>b</sup>   | 37.03±2.65 <sup>a</sup>    | 25.33±2.01 <sup>b</sup>  |
|            | 2-acetylfuran            | Sweet, almond, cocoa, caramel          | 15.55±0.86 <sup>c</sup>   | 17.28±0.95 <sup>b</sup>        | 17.44±1.38 <sup>b</sup>    | 17.71±1.19 <sup>b</sup>   | 19.90±1.58 <sup>a</sup>    | 19.91±1.25 <sup>a</sup>  |
| Total      |                          | 117.34±9.88 <sup>c</sup>               | 128.76±8.46 <sup>bc</sup> | 130.93±11.52 <sup>b</sup><br>c | 134.04±10.24 <sup>bc</sup> | 157.91±12.44 <sup>a</sup> | 142.74±11.29 <sup>ab</sup> |                          |
| Aldehydes  | 2-methylbutyral          | Cocoa, coffee, nutty, malty, alcoholic | 1.93±1.28 <sup>d</sup>    | 8.23±0.59 <sup>bc</sup>        | 7.59±0.51 <sup>c</sup>     | 9.10±0.88 <sup>a</sup>    | 8.37±0.57 <sup>bc</sup>    | 9.07±0.81 <sup>a</sup>   |
|            | isoamylaldehyde          | Chocolate                              | -                         | 4.38±0.25 <sup>d</sup>         | 6.81±0.34 <sup>c</sup>     | 7.74±0.41 <sup>b</sup>    | 8.63±0.68 <sup>a</sup>     | 7.8±0.64 <sup>ab</sup>   |
|            | Hexal (aldehyde C-6)     | Green, fruity                          | 0.63±0.05 <sup>b</sup>    | 0.73±0.06 <sup>b</sup>         | 1.11±0.07 <sup>a</sup>     | 1.04±0.06 <sup>a</sup>    | 0.64±0.05 <sup>b</sup>     | 0.39±0.02 <sup>c</sup>   |
|            | benzaldehyde             | Bitter almond odor, nutty              | 2.69±0.15 <sup>a</sup>    | 2.02±0.13 <sup>c</sup>         | 1.95±0.12 <sup>c</sup>     | 2.32±0.18 <sup>b</sup>    | 2.30±0.16 <sup>b</sup>     | 2.53±0.25 <sup>ab</sup>  |
|            | 5-methylfurfural         | Spicy, caramel, maple                  | 66.48±5.32 <sup>b</sup>   | 67.45±4.27 <sup>b</sup>        | 66.64±5.34 <sup>b</sup>    | 68.39±5.87 <sup>b</sup>   | 88.68±7.51 <sup>a</sup>    | 80.26±6.33 <sup>ab</sup> |

|           |                              |                                |                         |                          |                          |                           |                           |                           |
|-----------|------------------------------|--------------------------------|-------------------------|--------------------------|--------------------------|---------------------------|---------------------------|---------------------------|
|           | 1-methyl-2-pyrroformaldehyde | Roasted, nutty                 | 9.58±0.70 <sup>b</sup>  | 9.78±0.64 <sup>b</sup>   | 10.20±0.82 <sup>b</sup>  | 10.81±0.93 <sup>b</sup>   | 12.81±0.81 <sup>a</sup>   | 11.85±0.92 <sup>ab</sup>  |
|           | Total                        |                                | 81.32±5.35 <sup>d</sup> | 92.59±6.87 <sup>cd</sup> | 94.30±7.55 <sup>cd</sup> | 99.40±8.45 <sup>bc</sup>  | 121.43±10.45 <sup>a</sup> | 111.89±9.79 <sup>ab</sup> |
| Esters    | Glycol diacetate             | Green, flowery, alcoholic      | 1.76±0.11 <sup>b</sup>  | 1.63±0.13 <sup>b</sup>   | 1.61±0.10 <sup>b</sup>   | 2.68±0.19 <sup>a</sup>    | -                         | 2.60±0.19 <sup>a</sup>    |
|           | Furfuryl acetate             | Sweet, fruit, banana           | 59.78±3.18 <sup>c</sup> | 67.01±6.43 <sup>b</sup>  | 67.21±4.83 <sup>b</sup>  | 68.52±5.61 <sup>b</sup>   | 75.17±5.68 <sup>ab</sup>  | 78.61±6.99 <sup>a</sup>   |
|           | Furfuryl propionate          | Sweet, fruit, banana           | 2.84±0.17 <sup>c</sup>  | 3.17±0.25 <sup>b</sup>   | 3.11±0.19 <sup>b</sup>   | 3.24±0.17 <sup>b</sup>    | 3.92±0.35 <sup>a</sup>    | 4.35±0.34 <sup>a</sup>    |
|           | Total                        |                                | 64.38±4.74 <sup>c</sup> | 71.81±6.52 <sup>bc</sup> | 71.94±5.95 <sup>bc</sup> | 74.43±6.65 <sup>abc</sup> | 79.09±5.41 <sup>ab</sup>  | 85.57±6.79 <sup>a</sup>   |
| Pyrazines | 2, 5-dimethylpyrazine        | Cocoa, nutty, beef             | 6.08±0.59 <sup>d</sup>  | 7.11±0.56 <sup>c</sup>   | 7.82±0.64 <sup>b</sup>   | 8.39±0.71 <sup>ab</sup>   | 9.53±0.81 <sup>a</sup>    | 8.33±0.81 <sup>ab</sup>   |
|           | 2, 6-dimethylpyrazine        | Cocoa, nutty                   | 6.09±0.41 <sup>c</sup>  | 7.20±0.39 <sup>b</sup>   | 7.19±0.61 <sup>b</sup>   | 8.00±0.55 <sup>a</sup>    | 8.41±0.59 <sup>a</sup>    | 7.89±0.42 <sup>a</sup>    |
|           | 2-ethylpyrazine              | Peanut, butter, nutty, cocoa   | 4.42±0.39 <sup>c</sup>  | 4.73±0.35 <sup>c</sup>   | 6.74±0.55 <sup>b</sup>   | 7.76±0.72 <sup>a</sup>    | 6.92±0.43 <sup>b</sup>    | 7.36±0.48 <sup>ab</sup>   |
|           | 2, 3-dimethylpyrazine        | Nutty, cocoa, peanut, walnut   | 0.54±0.04 <sup>c</sup>  | 0.86±0.06 <sup>b</sup>   | 0.99±0.06 <sup>a</sup>   | 0.58±0.03 <sup>c</sup>    | 1.00±0.08 <sup>a</sup>    | 0.61±0.05 <sup>c</sup>    |
|           | 2-ethyl-6-methylpyrazine     | Roasted, potato                | 10.53±0.56 <sup>e</sup> | 11.44±0.84 <sup>d</sup>  | 12.96±0.75 <sup>c</sup>  | 15.00±0.76 <sup>b</sup>   | 16.15±0.97 <sup>a</sup>   | 15.88±0.91 <sup>ab</sup>  |
|           | Hazelnut pyrazine            | Nutty, peanut, corn, bread     | 3.13±0.30 <sup>d</sup>  | 4.14±0.35 <sup>c</sup>   | 4.97±0.38 <sup>b</sup>   | 5.08±0.47 <sup>b</sup>    | 6.02±0.58 <sup>a</sup>    | 6.09±0.53 <sup>a</sup>    |
|           | 3, 6-theopyrazine            | Potato, cocoa, nutty           | 5.74±0.41 <sup>c</sup>  | 5.63±0.42 <sup>c</sup>   | 4.96±0.43 <sup>d</sup>   | 6.37±0.51 <sup>ab</sup>   | 5.94±0.30 <sup>bc</sup>   | 7.20±0.62 <sup>a</sup>    |
|           | 2-vinylpyrazine              | Nutty                          | -                       | 0.58±0.04                | -                        | -                         | -                         | -                         |
|           | Coffee pyrazine              | Coffee, nutty                  | 1.24±0.07               | -                        | -                        | -                         | -                         | -                         |
|           | Total                        |                                | 37.77±2.75 <sup>c</sup> | 41.69±3.43 <sup>bc</sup> | 45.63±4.21 <sup>b</sup>  | 51.18±3.95 <sup>a</sup>   | 53.98±4.02 <sup>a</sup>   | 53.34±4.15 <sup>a</sup>   |
| Alcohols  | hexanol                      | Fruit, alcoholic, sweet, green | -                       | 0.71±0.05 <sup>b</sup>   | 0.85±0.05 <sup>a</sup>   | 0.81±0.06 <sup>a</sup>    | -                         | 0.69±0.04 <sup>b</sup>    |

|         |                       |                                        |                         |                         |                          |                         |                          |                         |
|---------|-----------------------|----------------------------------------|-------------------------|-------------------------|--------------------------|-------------------------|--------------------------|-------------------------|
| Ketones | (E). -linalool oxide  | Flowery                                | 4.55±0.34 <sup>c</sup>  | 5.35±0.35 <sup>b</sup>  | 5.78±0.48 <sup>b</sup>   | 5.73±0.42 <sup>b</sup>  | 8.33±0.81 <sup>a</sup>   | 7.75±0.61 <sup>a</sup>  |
|         | (furanoic acid)       |                                        |                         |                         |                          |                         |                          |                         |
|         | 2-ethyl-1-hexanol     | Oranges, flowery, sweet                |                         | 0.60±0.03 <sup>a</sup>  | 0.59±0.02 <sup>a</sup>   | 0.65±0.04 <sup>a</sup>  | -                        | 0.59±0.04 <sup>a</sup>  |
|         | linalool              | Oranges, flowery, sweet, rose          | 6.95±0.55 <sup>c</sup>  | 7.02±0.61 <sup>c</sup>  | 7.79±0.63 <sup>c</sup>   | 9.38±0.48 <sup>b</sup>  | 9.93±0.91 <sup>b</sup>   | 12.93±0.93 <sup>a</sup> |
|         | alpha-terpineol       | Pine, terpene, lilac, oranges, flowery | 2.32±0.17 <sup>c</sup>  | 2.31±0.20 <sup>c</sup>  | 2.10±0.15 <sup>d</sup>   | 2.18±0.20 <sup>d</sup>  | 2.87±0.15 <sup>b</sup>   | 3.24±0.28 <sup>a</sup>  |
|         | nerolol               | Sweet, oranges                         | 0.51±0.05 <sup>b</sup>  | 0.52±0.03 <sup>b</sup>  | 0.39±0.05 <sup>c</sup>   | 0.40±0.02 <sup>c</sup>  | 0.68±0.04 <sup>a</sup>   | 0.69±0.07 <sup>a</sup>  |
|         | Total                 |                                        | 14.33±1.21 <sup>d</sup> | 16.51±1.43 <sup>c</sup> | 17.52±1.36 <sup>bc</sup> | 19.16±1.55 <sup>b</sup> | 21.81±1.38 <sup>ab</sup> | 25.89±2.02 <sup>a</sup> |
|         | Methyl ethyl ketone   | Fruit, camphor                         | 0.25±0.02 <sup>b</sup>  | 0.28±0.02 <sup>b</sup>  | 0.62±0.04 <sup>a</sup>   | 0.26±0.02 <sup>b</sup>  | -                        | 0.68±0.05 <sup>a</sup>  |
|         | 2, 3-butanedione      | Butter, sweet, caramel                 | -                       | 1.72±0.13 <sup>a</sup>  | 1.64±0.12 <sup>a</sup>   | 1.41±0.10 <sup>b</sup>  | 1.73±0.09 <sup>a</sup>   | 0.63±0.04 <sup>c</sup>  |
|         | 2, 3-hexadione        | Sweet, caramel, butter, fruit          | 1.15±0.01 <sup>d</sup>  | 2.75±0.16 <sup>a</sup>  | 1.97±0.18 <sup>b</sup>   | 1.64±0.13 <sup>c</sup>  | 1.88±0.14 <sup>b</sup>   | 1.70±0.12 <sup>c</sup>  |
| Ketones | 3, 4-hexanedione      | Butter, almond, nutty, caramel         | 1.31±0.07 <sup>b</sup>  | 1.45±0.10 <sup>b</sup>  | 0.85±0.05 <sup>c</sup>   | 0.72±0.03 <sup>d</sup>  | 1.63±0.11 <sup>a</sup>   | 0.81±0.08 <sup>cd</sup> |
|         | ethylcyclopentenone   | Sweet, caramel, maple                  | 1.98±0.12 <sup>c</sup>  | 2.13±0.19 <sup>c</sup>  | 2.06±0.13 <sup>c</sup>   | 1.97±0.16 <sup>c</sup>  | 2.93±0.28 <sup>a</sup>   | 2.59±0.21 <sup>b</sup>  |
|         | 3-hexanone            | Sweet, fruit, grape                    | -                       | 0.23±0.01 <sup>b</sup>  | 0.25±0.02 <sup>b</sup>   | 1.13±0.08 <sup>a</sup>  | -                        | -                       |
|         | 2, 3-pentadione       | Butter, caramel, nutty                 | 3.81±0.32 <sup>d</sup>  | 5.64±0.47 <sup>c</sup>  | 8.29±0.43 <sup>a</sup>   | 6.37±0.52 <sup>bc</sup> | 6.11±0.54 <sup>bc</sup>  | 6.90±0.52 <sup>b</sup>  |
|         | 1-acetoxyacetone      | Fruit, butter, nutty                   | -                       | -                       | -                        | -                       | 2.49±0.16                | -                       |
|         | (E) -beta-damascenone | Apple, rose, honey, sweet              | -                       | -                       | -                        | -                       | -                        | 0.45±0.03               |
|         | 2, 3-octanedione      | Cumin, coriander                       | 0.68±0.04               | -                       | -                        | -                       | -                        | -                       |
|         | Furfural acetone      | Spicy, cinnamon, vanilla               | -                       | -                       | -                        | -                       | -                        | 0.41±0.04               |
|         | Total                 |                                        | 9.17±0.62 <sup>c</sup>  | 14.20±1.09 <sup>b</sup> | 15.68±1.25 <sup>ab</sup> | 13.50±1.16 <sup>b</sup> | 16.77±1.34 <sup>a</sup>  | 14.17±1.29 <sup>b</sup> |
|         |                       |                                        |                         |                         |                          |                         |                          |                         |

|                 |                                     |                                       |                         |                         |                           |                          |                           |                            |
|-----------------|-------------------------------------|---------------------------------------|-------------------------|-------------------------|---------------------------|--------------------------|---------------------------|----------------------------|
| Pyridines       | pyridine                            | Sour, pourri                          | 9.12±0.57 <sup>c</sup>  | 11.16±0.83 <sup>b</sup> | 13.74±0.93 <sup>a</sup>   | 13.21±0.69 <sup>a</sup>  | 12.66±0.69 <sup>ab</sup>  | 12.57±0.75 <sup>ab</sup>   |
|                 | 3-ethylpyridine                     | Tobacco, leather                      | -                       | -                       | 0.37±0.03 <sup>a</sup>    | -                        | 0.37±0.02 <sup>a</sup>    | -                          |
|                 | Total                               |                                       | 9.12±0.59 <sup>d</sup>  | 11.16±0.83 <sup>c</sup> | 14.11±1.26 <sup>a</sup>   | 13.21±1.21 <sup>ab</sup> | 13.03±1.09 <sup>ab</sup>  | 12.57±0.93 <sup>b</sup>    |
| Phenols         | phenol                              | Plastics, caoutchouc                  | 0.74±0.06 <sup>e</sup>  | 0.85±0.05 <sup>d</sup>  | 1.11±0.07 <sup>c</sup>    | 1.22±0.09 <sup>bc</sup>  | 1.47±0.13 <sup>b</sup>    | 2.17±0.18 <sup>a</sup>     |
|                 | 4-ethyl guaiacol                    | Spicy, smoky, bacon                   | 1.19±0.08 <sup>b</sup>  | 1.22±0.07 <sup>b</sup>  | 1.25±0.10 <sup>b</sup>    | 1.27±0.11 <sup>b</sup>   | 1.99±0.14 <sup>a</sup>    | 1.98±0.14 <sup>a</sup>     |
|                 | o-cresol                            | Musty, plastics, herbs                | 0.53±0.03 <sup>c</sup>  | 0.62±0.04 <sup>b</sup>  | 0.49±0.04 <sup>c</sup>    | 0.50±0.03 <sup>c</sup>   | 0.81±0.05 <sup>a</sup>    | 0.80±0.05 <sup>a</sup>     |
|                 | Total                               |                                       | 2.47±0.17 <sup>d</sup>  | 2.69±0.15 <sup>cd</sup> | 2.85±0.19 <sup>c</sup>    | 2.99±0.16 <sup>c</sup>   | 4.27±0.25 <sup>b</sup>    | 4.96±0.33 <sup>a</sup>     |
| Pyrroles        | 1-methylpyrrole                     | Smoky, woody, herbs                   | 1.97±0.14 <sup>b</sup>  | 1.47±0.11 <sup>c</sup>  | 1.33±0.11 <sup>cd</sup>   | 1.44±0.12 <sup>c</sup>   | 2.43±0.18 <sup>a</sup>    | 1.24±0.10 <sup>d</sup>     |
|                 | 2-acetyl-1-methylpyrrole            | Earthy                                | 3.04±0.26 <sup>b</sup>  | 3.05±0.28 <sup>b</sup>  | 3.19±0.25 <sup>b</sup>    | 3.34±0.19 <sup>b</sup>   | 4.15±0.35 <sup>a</sup>    | 4.06±0.38 <sup>a</sup>     |
|                 | 1-furfuryl pyrrole                  | Plastics, waxiness, fruit, vegetables | 7.04±0.45 <sup>c</sup>  | 7.58±0.64 <sup>bc</sup> | 7.56±0.65 <sup>bc</sup>   | 7.90±0.51 <sup>b</sup>   | 9.86±0.66 <sup>a</sup>    | 9.33±0.69 <sup>a</sup>     |
|                 | 2-acetylpyrrole                     | Musty, nutty                          | 0.57±0.04 <sup>b</sup>  | 0.60±0.05 <sup>b</sup>  | 0.61±0.04 <sup>b</sup>    | 0.60±0.03 <sup>b</sup>   | 1.59±0.13 <sup>a</sup>    | 0.94±0.08 <sup>b</sup>     |
|                 | 2-formylpyrrole                     | Musty                                 | 0.66±0.05 <sup>cd</sup> | 0.62±0.04 <sup>d</sup>  | 0.69±0.06 <sup>cd</sup>   | 0.73±0.04 <sup>c</sup>   | 1.85±0.11 <sup>a</sup>    | 1.24±0.12 <sup>b</sup>     |
|                 | Total                               |                                       | 13.27±1.34 <sup>c</sup> | 13.31±0.98 <sup>c</sup> | 13.37±1.25 <sup>c</sup>   | 14.00±1.21 <sup>c</sup>  | 19.89±1.43 <sup>a</sup>   | 16.82±1.39 <sup>b</sup>    |
| Ethers          | Furan, 2-(methoxymethyl)-           | Coffee                                | -                       | -                       | 2.34±0.21 <sup>a</sup>    | 2.32±0.18 <sup>a</sup>   | 2.04±0.12 <sup>ab</sup>   | 1.98±0.18 <sup>b</sup>     |
|                 | Furan, 2,2'-[oxybis(methylene)]bis- | Coffee, nutty, earthy                 | 1.59±1.21 <sup>b</sup>  | 1.69±0.13 <sup>b</sup>  | 1.55±0.14 <sup>b</sup>    | 1.70±0.09 <sup>b</sup>   | 2.61±0.22 <sup>a</sup>    | 2.53±0.24 <sup>a</sup>     |
|                 | Furan, 2-[(methylthio)methyl]-      | Onion, garlic, sulphury, vegetables   | -                       | 1.77±0.11               | -                         | -                        | -                         | -                          |
|                 | Total                               |                                       | 1.59±0.12 <sup>d</sup>  | 3.46±0.25 <sup>c</sup>  | 3.90±0.33 <sup>b</sup>    | 4.02±0.38 <sup>ab</sup>  | 4.65±0.42 <sup>a</sup>    | 4.54±0.39 <sup>a</sup>     |
| Total compounds |                                     |                                       | 350.77±28.9             | 396.17±33.4             | 410.23±38.42 <sup>b</sup> | 438.07±36.9              | 507.84±43.68 <sup>a</sup> | 472.49±40.01 <sup>ab</sup> |
|                 |                                     |                                       | 2 <sup>d</sup>          | 5 <sup>cd</sup>         | cd                        | 9 <sup>abc</sup>         |                           |                            |

Values are expressed as mean ± standard deviation. The superscript letters (a, b, c, d, and e) represent statistically significant differences between extraction conditions, as determined through one-way analysis of variance ( $p < 0.05$ ). Control group: conventional cold brew (0.1 MPa, 12 h, 5°C)
